# Supplementary material for: Distinct functions of three Wnt proteins control mirror-symmetric organogenesis in the C. elegans gonad
Source: eLife. 2024 Nov 1;13:e103035. doi: 10.7554/eLife.103035 (PMC11620738; doi:10.7554/eLife.103035)
Supplement: Figure 3—source data 1. [file elife-103035-fig3-data1.xlsx]

## Sheet: Figure3B_Psys-1  GFP(NLS)
Data used to calculate the regression line for POP-1 quantification(Psys-1 GFP(NLS))
Proximal daughter	Proximal daughter	Distal daughter	Distal daughter
GFP intensity	depth(micro m)	GFP intensity	depth(micro m)	difference of depth (prox-dist)	intensity ratio (prox/dist)	log(intensity ratio)
74	8	54	8	0	1.37	0.136721
86	5.5	91	7	-1.5	0.95	-0.0222764
150	7.5	147	9	-1.5	1.02	0.00860017
112	7.5	108	7.5	0	1.04	0.0170333
197	4.5	143	8	-3.5	1.38	0.139879
169	8	240	4	4	0.7	-0.154902
102	4.5	102	3	1.5	1	0
91	5.5	93	8.5	-3	0.98	-0.00877392
115	3	104	3	0	1.1	0.0413927
110	6.5	60	10.5	-4	1.83	0.262451
45	9.5	74	4	5.5	0.61	-0.21467
124	6.5	204	2.5	4	0.61	-0.21467
210	no Z stack (Same phocal plane)	210	no Z stack (Same phocal plane)	0	1	0
158	2.5	130	6	-3.5	1.22	0.0863598
151	5	156	5	0	0.97	-0.0132283
186	9.5	148	9.5	0	1.26	0.100371
86	7.5	81	7.5	0	1.06	0.0253059
249	5	216	10	-5	1.15	0.0606978
126	4	96	8.5	-4.5	1.31	0.117271
176	10	145	10	0	1.21	0.0827854
67	0	67	0	0	1	0
181	4.5	189	4.5	0	0.96	-0.0177288
156	9.5	165	9.5	0	0.95	-0.0222764
182	10	118	11	-1	1.54	0.187521
201	4.5	199	4.5	0	1.01	0.00432137
143	6.5	77	11	-4.5	1.86	0.269513
94	8.5	144	3.5	5	0.65	-0.187087
177	6	189	4.5	1.5	0.94	-0.0268721
140	9	177	6	3	0.79	-0.102373
150	8	197	3.5	4.5	0.76	-0.119186
72	7.5	137	3.5	4	0.53	-0.275724
93	5.5	99	5.5	0	0.94	-0.0268721
194	5	210	5	0	0.92	-0.0362122
163	5.5	165	4.5	1	0.99	-0.00436481
206	6.5	219	4	2.5	0.94	-0.0268721
126	8.5	172	4	4.5	0.73	-0.136677
187	6.5	127	10	-3.5	1.47	0.167317
123	4.5	100	5.5	-1	1.23	0.0899051
59	2.5	58	3	-0.5	1.02	0.00860017
54	4.5	58	5	-0.5	0.93	-0.0315171
149	6.5	179	4	2.5	0.83	-0.0809219
125	4	86	7	-3	1.45	0.161368
193	5	90	10	-5	2.14	0.330414
116	3.5	130	4	-0.5	0.89	-0.05061
148	4.5	144	4.5	0	1.03	0.0128372
113	4.5	95	8	-3.5	1.19	0.075547
83	3.5	84	3.5	0	0.99	-0.00436481
132	7.5	109	8.5	-1	1.21	0.0827854
64	6.5	54	9	-2.5	1.19	0.075547
62	5	72	5	0	0.86	-0.0655015
189	11	223	6.5	4.5	0.85	-0.0705811
198	8	231	3.5	4.5	0.86	-0.0655015
170	3	150	6	-3	1.13	0.0530784
130	8.5	71	13	-4.5	1.83	0.262451
140	8	207	3	5	0.68	-0.167491
142	7.5	160	3	4.5	0.89	-0.05061
211	5.5	159	8	-2.5	1.32	0.120574
206	5.5	162	7	-1.5	1.27	0.103804
125	8.5	164	3.5	5	0.76	-0.119186
79	7	126	2.5	4.5	0.63	-0.200659
75	7.5	105	3.5	4	0.71	-0.148742
88	7.5	129	4	3.5	0.68	-0.167491
184	4.5	128	8.5	-4	1.44	0.158362
191	8	228	4.5	3.5	0.84	-0.0757207
233	5	217	5	0	1.07	0.0293838
196	4	155	9.5	-5.5	1.27	0.103804
152	9.5	204	4	5.5	0.75	-0.124939
134	10	191	3.5	6.5	0.7	-0.154902
220	5.5	183	9	-3.5	1.2	0.0791812
144	9	189	4.5	4.5	0.76	-0.119186
139	8.5	213	4	4.5	0.65	-0.187087
171	8.5	229	4.5	4	0.75	-0.124939
156	8	205	3	5	0.76	-0.119186
120	4.5	103	4.5	0	1.17	0.0681859
100	9.5	161	3.5	6	0.62	-0.207608
125	5.5	86	8.5	-3	1.45	0.161368
98	8	124	4.5	3.5	0.79	-0.102373
223	3.5	125	8	-4.5	1.78	0.25042
209	4	164	8	-4	1.27	0.103804
205	4.5	165	7.5	-3	1.24	0.0934217
119	4.5	93	7.5	-3	1.28	0.10721
161	5	138	9	-4	1.17	0.0681859
151	8.5	181	3.5	5	0.83	-0.0809219
162	8.5	175	5.5	3	0.93	-0.0315171
231	5.5	131	8.5	-3	1.76	0.245513
75	8.5	95	4	4.5	0.79	-0.102373
172	4	122	8	-4	1.41	0.149219
158	4	87	7.5	-3.5	1.82	0.260071
126	7	150	4.5	2.5	0.84	-0.0757207
150	4.5	105	8.5	-4	1.43	0.155336
91	4	70	8.5	-4.5	1.3	0.113943
133	8	171	4.5	3.5	0.78	-0.107905
122	4	89	8.5	-4.5	1.37	0.136721
146	4.5	106	9	-4.5	1.38	0.139879
137	2.5	131	3.5	-1	1.05	0.0211893
97	9.5	140	5	4.5	0.69	-0.161151
87	8.5	150	3.5	5	0.58	-0.236572

## Sheet: Figure3B_Z1
Data used for POP-1 quantification in Z1 cells
qIs74_22.5℃										lin17 qIs74_22.5℃										lin17 qIs74_15℃										mom-5 qIs74_22.5℃										lin17 mom-5 qIs74_22.5℃
Proximal daughter	Proximal daughter	Distal daughter	Distal daughter							Proximal daughter	Proximal daughter	Distal daughter	Distal daughter							Proximal daughter	Proximal daughter	Distal daughter	Distal daughter							Proximal daughter	Proximal daughter	Distal daughter	Distal daughter							Proximal daughter	Proximal daughter	Distal daughter	Distal daughter
GFP intensity	depth(micro m)	GFP intensity	depth(micro m)	difference of depth (prox-dist)	intensity ratio (prox/dist)	log(intensity ratio)	ri values (used in Figure 3B)	Absolute values of ri (used in Figure 3-Figure supplement 2)		GFP intensity	depth(micro m)	GFP intensity	depth(micro m)	difference of depth (prox-dist)	intensity ratio (prox/dist)	log(intensity ratio)	ri values (used in Figure 3B)	Absolute values of ri (used in Figure 3-Figure supplement 2)		GFP intensity	depth(micro m)	GFP intensity	depth(micro m)	difference of depth (prox-dist)	intensity ratio (prox/dist)	log(intensity ratio)	ri values (used in Figure 3B)	Absolute values of ri (used in Figure 3-Figure supplement 2)		GFP intensity	depth(micro m)	GFP intensity	depth(micro m)	difference of depth (prox-dist)	intensity ratio (prox/dist)	log(intensity ratio)	ri values (used in Figure 3B)	Absolute values of ri (used in Figure 3-Figure supplement 2)		GFP intensity	depth(micro m)	GFP intensity	depth(micro m)	difference of depth (prox-dist)	intensity ratio (prox/dist)	log(intensity ratio)	ri values (used in Figure 3B)	Absolute values of ri (used in Figure 3-Figure supplement 2)
124	3.69	46	6.77	-3.08	2.7	0.431364	0.311844	0.311844		155	5.31	57	8.84	-3.53	2.72	0.434569	0.299749	0.299749		84	8.5	53	4.5	4	1.58491	0.200003	0.321203	0.321203		149	6.14	98	3.84	2.3	1.52	0.181844	0.245244	0.245244		185	6	88	12.5	-6.5	2.1	0.322219	0.0864193	0.0864193
153	5.01	36	9.3	-4.29	4.25	0.628389	0.467729	0.467729		149	6.48	65	6.48	0	2.29	0.359835	0.345035	0.345035		63	6.5	28	4	2.5	2.25	0.352183	0.422383	0.422383		173	4.32	50	7.77	-3.45	3.46	0.539076	0.406976	0.406976		116	8.5	144	2.5	6	0.81	-0.091515	0.097685	0.097685
131	7.87	74	3.58	4.29	1.77	0.247973	0.379033	0.379033		125	6.76	97	4.51	2.25	1.29	0.11059	0.17229	0.17229		33	10	29	8	2	1.13793	0.0561159	0.109316	0.109316		127	10.22	90	6.39	3.83	1.41	0.149219	0.264639	0.264639		45	11.5	42	8	3.5	1.07	0.0293838	0.133584	0.133584
125	3.96	41	7.92	-3.96	3.05	0.4843	0.33486	0.33486		127	5.55	85	2.38	3.17	1.49	0.173186	0.266166	0.266166		49	7.5	32	6	1.5	1.53125	0.185046	0.221246	0.221246		172	4.18	96	4.18	0	1.79	0.252853	0.238053	0.238053		128	7.5	66	11.5	-4	1.94	0.287802	0.137002	0.137002
202	4.86	107	3.24	1.62	1.89	0.276462	0.316742	0.316742		146	7.06	36	10.6	-3.54	4.06	0.608526	0.473366	0.473366		65	7	12	10.5	-3.5	5.41667	0.733732	0.599932	0.599932		114	7.24	85	4.82	2.42	1.34	0.127105	0.194585	0.194585		132	1.5	90	5.5	-4	1.47	0.167317	0.0165173	0.0165173
97	5.67	51	1.62	4.05	1.9	0.278754	0.401654	0.401654		150	2.89	145	4.82	-1.93	1.04	0.0170333	-0.0633867	0.0633867		48	9	34	4.5	4.5	1.41176	0.149762	0.287962	0.287962		66	14.84	22	16.04	-1.2	3	0.477121	0.421521	0.421521		103	7	61	12.5	-5.5	1.69	0.227887	0.0260867	0.0260867
79	4.05	53	2.43	1.62	1.49	0.173186	0.213466	0.213466		176	4.55	91	4.55	0	1.93	0.285557	0.270757	0.270757		41	8	13	10.5	-2.5	3.15385	0.498841	0.399041	0.399041		190	6.46	126	3.23	3.23	1.51	0.178977	0.273997	0.273997		63	11	56	11	0	1.13	0.0530784	0.0382784	0.0382784
122	7.72	74	4.41	3.31	1.65	0.217484	0.315224	0.315224		121	3.07	110	7.17	-4.1	1.1	0.0413927	-0.112807	0.112807		33	4	52	4	0	0.634615	-0.197489	-0.212289	0.212289		186	6.53	59	11.75	-5.22	3.15	0.498311	0.306031	0.306031		104	6	63	8	-2	1.65	0.217484	0.134684	0.134684
148	7.35	31	11.77	-4.42	4.77	0.678518	0.513438	0.513438		69	9.22	66	4.1	5.12	1.05	0.0211893	0.180469	0.180469		82	5	24	8	-3	3.41667	0.533603	0.416803	0.416803		123	6.49	26	11.9	-5.41	4.73	0.674861	0.476121	0.476121
87	7.26	23	10.17	-2.91	3.78	0.577492	0.463752	0.463752		119	8	93	4.57	3.43	1.28	0.10721	0.20903	0.20903		87	5	38	6.5	-1.5	2.28947	0.359736	0.293936	0.293936		153	6.24	87	4.99	1.25	1.76	0.245513	0.273213	0.273213
140	3.78	38	6.81	-3.03	3.68	0.565848	0.448028	0.448028		85	5.61	24	10.28	-4.67	3.54	0.549003	0.375423	0.375423		145	7.5	89	4.5	3	1.62921	0.211978	0.299178	0.299178		105	10.63	41	10.63	0	2.56	0.40824	0.39344	0.39344
110	6.15	21	6.91	-0.76	5.23	0.718502	0.677862	0.677862		170	4.67	41	9.35	-4.68	4.15	0.618048	0.444128	0.444128		95	6	31	9.5	-3.5	3.06452	0.486362	0.352562	0.352562		97	9.84	86	6.15	3.69	1.13	0.0530784	0.163738	0.163738
140	8	110	3.43	4.57	1.27	0.103804	0.244384	0.244384		63	9.35	28	9.35	0	2.25	0.352183	0.337383	0.337383		43	11.5	22	11.5	0	1.95455	0.291046	0.276246	0.276246		98	4.8	31	9.61	-4.81	3.16	0.499687	0.321347	0.321347
198	2.83	96	2.83	0	2.06	0.313867	0.299067	0.299067		52	9.35	36	7.48	1.87	1.44	0.158362	0.207142	0.207142		77	4	88	5.5	-1.5	0.875	-0.0579919	-0.123792	0.123792
43	11	18	11	0	2.39	0.378398	0.363598	0.363598		119	10.78	61	7.55	3.23	1.95	0.290035	0.385055	0.385055		48	9	23	11	-2	2.08696	0.319513	0.236713	0.236713
55	9.5	14	10	-0.5	3.93	0.594393	0.562593	0.562593		166	4.31	85	4.31	0	1.95	0.290035	0.275235	0.275235		96	7.5	17	10	-2.5	5.64706	0.751822	0.652022	0.652022
102	6	44	6	0	2.32	0.365488	0.350688	0.350688		156	4.31	30	9.71	-5.4	5.2	0.716003	0.517603	0.517603		32	11.5	10	11.5	0	3.2	0.50515	0.49035	0.49035
139	5.5	56	5	0.5	2.48	0.394452	0.396652	0.396652		96	9.71	120	5.39	4.32	0.8	-0.09691	0.03517	0.03517		82	3.5	41	4	-0.5	2	0.30103	0.26923	0.26923
111	6	54	6	0	2.06	0.313867	0.299067	0.299067		97	10.78	41	10.78	0	2.37	0.374748	0.359948	0.359948		42	9	40	7.5	1.5	1.05	0.0211893	0.0573893	0.0573893
80	6.5	26	8	-1.5	3.08	0.488551	0.422751	0.422751												90	5	40	5	0	2.25	0.352183	0.337383	0.337383
93	8	34	8	0	2.74	0.437751	0.422951	0.422951												28	10.5	60	5.5	5	0.466667	-0.330993	-0.175793	0.175793
45	9.5	18	9.5	0	2.5	0.39794	0.38314	0.38314												33	7	20	6.5	0.5	1.65	0.217484	0.219684	0.219684
59	8.5	19	10	-1.5	3.11	0.49276	0.42696	0.42696
58	11	20	10	1	2.9	0.462398	0.481598	0.481598
106	8.5	62	5	3.5	1.71	0.232996	0.337196	0.337196
67	6	34	6	0	1.97	0.294466	0.279666	0.279666
[truncated: 63 more columns]

## Sheet: Figure3B_Z4
Data used for POP-1 quantification in Z4 cells
qIs74_22.5℃										lin17 qI74_22.5℃										lin17 qIs74_15℃										mom-5 qIs74_22.5℃										lin17 mom-5 qIs74_22.5℃
Proximal daughter	Proximal daughter	Distal daughter	Distal daughter							Proximal daughter	Proximal daughter	Distal daughter	Distal daughter							Proximal daughter	Proximal daughter	Distal daughter	Distal daughter							Proximal daughter	Proximal daughter	Distal daughter	Distal daughter							Proximal daughter	Proximal daughter	Distal daughter	Distal daughter
GFP intensity	depth(micro m)	GFP intensity	depth(micro m)	difference of depth (prox-dist)	intensity ratio (prox/dist)	log(intensity ratio)	ri values (used in Figure 3B)	Absolute values of ri (used in Figure 3-Figure supplement 2)		GFP intensity	depth(micro m)	GFP intensity	depth(micro m)	difference of depth (prox-dist)	intensity ratio (prox/dist)	log(intensity ratio)	ri values (used in Figure 3B)	Absolute values of ri (used in Figure 3-Figure supplement 2)		GFP intensity	depth(micro m)	GFP intensity	depth(micro m)	difference of depth (prox-dist)	intensity ratio (prox/dist)	log(intensity ratio)	ri values (used in Figure 3B)	Absolute values of ri (used in Figure 3-Figure supplement 2)		GFP intensity	depth(micro m)	GFP intensity	depth(micro m)	difference of depth (prox-dist)	intensity ratio (prox/dist)	log(intensity ratio)	ri values (used in Figure 3B)	Absolute values of ri (used in Figure 3-Figure supplement 2)		GFP intensity	depth(micro m)	GFP intensity	depth(micro m)	difference of depth (prox-dist)	intensity ratio (prox/dist)	log(intensity ratio)	ri values (used in Figure 3B)	Absolute values of ri (used in Figure 3-Figure supplement 2)
105	4.92	86	1.85	3.07	1.22	0.0863598	0.17594	0.17594		87	8.1	87	2.7	5.4	1	0	0.1688	0.1688		84	4.5	12	9.5	-5	7	0.845098	0.660298	0.660298		139	4.61	56	9.21	-4.6	2.48	0.394452	0.223252	0.223252		61	12	56	12	0	1.09	0.0374265	0.0226265	0.0226265
163	5.72	80	2.15	3.57	2.03	0.307496	0.414076	0.414076		65	6.19	77	5.31	0.88	0.84	-0.0757207	-0.0606007	0.0606007		39	9.5	10	10	-0.5	3.9	0.591065	0.559265	0.559265		68	9.36	33	9.36	0	2.06	0.313867	0.299067	0.299067		132	6	137	6	0	0.96	-0.0177288	-0.0325288	0.0325288
134	7.87	31	10.02	-2.15	4.32	0.635484	0.547584	0.547584		87	6.48	33	11.66	-5.18	2.64	0.421604	0.230684	0.230684		78	7	23	10	-3	3.3913	0.530367	0.413567	0.413567		87	12.78	20	12.78	0	4.35	0.638489	0.623689	0.623689		120	4.5	91	10.5	-6	1.32	0.120574	-0.0982261	0.0982261
90	6.93	68	3.96	2.97	1.32	0.120574	0.206754	0.206754		108	6.76	32	11.27	-4.51	3.38	0.528917	0.360777	0.360777		44	9	40	5	4	1.1	0.0413927	0.162593	0.162593		140	7.32	67	8.36	-1.04	2.09	0.320146	0.269986	0.269986		102	5.5	139	1.5	4	0.73	-0.136677	-0.0154771	0.0154771
126	3.24	35	8.1	-4.86	3.6	0.556303	0.376263	0.376263		140	2.38	33	7.13	-4.75	4.24	0.627366	0.451066	0.451066		72	7	42	5	2	1.71429	0.234083	0.287283	0.287283		140	6.03	68	9.65	-3.62	2.06	0.313867	0.175987	0.175987		90	7.5	69	11	-3.5	1.3	0.113943	-0.0198566	0.0198566
74	2.43	17	7.29	-4.86	4.35	0.638489	0.458449	0.458449		153	7.06	95	3.53	3.53	1.61	0.206826	0.312046	0.312046		61	5.5	14	10.5	-5	4.35714	0.639202	0.454402	0.454402		129	11.11	77	8.64	2.47	1.68	0.225309	0.294489	0.294489		77	10.5	115	5.5	5	0.67	-0.173925	-0.0187252	0.0187252
140	6.62	27	8.82	-2.2	5.19	0.715167	0.625567	0.625567		105	4.55	99	9.11	-4.56	1.06	0.0253059	-0.144534	0.144534		33	9	21	5.5	3.5	1.57143	0.196295	0.300495	0.300495		104	10.42	53	10.42	0	1.96	0.292256	0.277456	0.277456		69	8	88	3	5	0.78	-0.107905	0.0472946	0.0472946
89	10.29	65	5.88	4.41	1.37	0.136721	0.271861	0.271861		143	4.67	135	2.8	1.87	1.06	0.0253059	0.0740859	0.0740859		73	5.5	21	9	-3.5	3.47619	0.541104	0.407304	0.407304		179	4.31	51	8.61	-4.3	3.51	0.545307	0.384307	0.384307
103	7.26	83	4.36	2.9	1.24	0.0934217	0.177222	0.177222		121	5.61	83	3.74	1.87	1.46	0.164353	0.213133	0.213133		94	4.5	31	8	-3.5	3.03226	0.481766	0.347966	0.347966		175	9.69	77	6.46	3.23	2.27	0.356026	0.451046	0.451046
150	3.03	58	1.51	1.52	2.59	0.4133	0.45018	0.45018		136	7.48	106	2.8	4.68	1.28	0.10721	0.25153	0.25153		99	5	29	11	-6	3.41379	0.533237	0.314437	0.314437		109	10.81	114	5.41	5.4	0.96	-0.0177288	0.151071	0.151071
147	4.61	89	2.3	2.31	1.65	0.217484	0.281224	0.281224		74	8.41	62	3.74	4.67	1.19	0.075547	0.219527	0.219527		65	7.5	53	4	3.5	1.22642	0.0886375	0.192837	0.192837		134	8.73	30	12.48	-3.75	4.47	0.650308	0.508008	0.508008
152	5.71	31	10.29	-4.58	4.9	0.690196	0.519676	0.519676		85	7.48	81	2.8	4.68	1.05	0.0211893	0.165509	0.165509		68	5.5	27	9	-3.5	2.51852	0.401145	0.267345	0.267345		119	9.45	73	3.54	5.91	1.63	0.212188	0.398328	0.398328
171	4.72	40	9.44	-4.72	4.28	0.631444	0.456164	0.456164		94	11.86	45	12.94	-1.08	2.09	0.320146	0.268626	0.268626		45	8	49	5.5	2.5	0.918367	-0.0369836	0.0332164	0.0332164		95	9.84	43	12.3	-2.46	2.21	0.344392	0.245952	0.245952
44	8.5	29	4	4.5	1.52	0.181844	0.320044	0.320044		142	4.31	41	10.78	-6.47	3.46	0.539076	0.304296	0.304296		42	9.5	35	4	5.5	1.2	0.0791812	0.251381	0.251381		111	3.6	60	4.8	-1.2	1.85	0.267172	0.211572	0.211572
113	6	29	11.5	-5.5	3.9	0.591065	0.389265	0.389265		125	7.55	82	3.24	4.31	1.52	0.181844	0.313584	0.313584		76	4.5	24	8	-3.5	3.16667	0.500602	0.366802	0.366802
78	7	16	11.5	-4.5	4.88	0.68842	0.52062	0.52062		104	7.55	102	3.24	4.31	1.02	0.00860017	0.14034	0.14034		87	8	49	4	4	1.77551	0.249323	0.370523	0.370523
62	10	42	5	5	1.48	0.170262	0.325462	0.325462		108	8.82	46	8.82	0	2.35	0.371068	0.356268	0.356268		71	5.5	25	11	-5.5	2.84	0.453318	0.251518	0.251518
40	8.5	31	4	4.5	1.29	0.11059	0.24879	0.24879												42	9	13	11.5	-2.5	3.23077	0.509306	0.409506	0.409506
51	11	43	4.5	6.5	1.19	0.075547	0.281747	0.281747												39	9	21	5	4	1.85714	0.268845	0.390045	0.390045
121	5	36	10	-5	3.36	0.526339	0.341539	0.341539												38	9	27	5	4	1.40741	0.14842	0.26962	0.26962
56	7.5	13	13.5	-6	4.31	0.634477	0.415677	0.415677
[truncated: 63 more columns]

## Sheet: Figure3D_Z1
Data used for evaluating SYS-1 asymmetry in Z1 cells
qIs95_22.5℃	lin-17 cwn-2 qIs95_22.5℃	lin-17 cwn-2 qIs95_15℃	lin-17 egl-20 cwn-2 qIs95_15℃
Normal	Normal	Sym	Rev
Normal	Normal	Sym	Rev
Normal	Sym	Sym	Rev
Normal	Sym	Sym	Rev
Normal	Normal	Sym	Rev
Normal	Normal	Sym	Rev
Normal	Normal	Normal	Rev
Normal	Normal	Normal	Rev
Normal	Normal	Sym	Rev
Normal	Sym	Normal	Rev
Normal	Normal	Normal	Rev
Normal	Sym	Normal	Rev
Normal	Normal	Sym	Rev
Normal	Normal	Normal	Rev
Normal	Sym	Rev	Rev
Normal	Sym	Normal	Rev
Normal	Sym	Sym	Rev
Normal	Sym	Normal	Rev
Normal	Normal	Normal	Rev
Normal	Sym		Rev
			Rev

## Sheet: Figure3D_Z4
Data used for evaluating SYS-1 asymmetry in Z4 cells
qIs95_22.5℃	lin-17 cwn-2 qIs95_22.5℃	lin-17 cwn-2 qIs95_15℃	lin-17 egl-20 cwn-2 qIs95_15℃
Normal	Normal	Sym	Normal
Normal	Normal	Sym	Normal
Normal	Normal	Sym	Normal
Normal	Normal	Normal	Normal
Normal	Normal	Normal	Normal
Normal	Normal	Normal	Normal
Normal	Normal	Normal	Normal
Normal	Normal	Normal	Normal
Normal	Normal	Sym	Normal
Normal	Normal	Normal	Normal
Normal	Normal	Normal	Normal
Normal	Normal	Normal	Normal
Normal	Normal	Normal	Normal
Normal	Normal	Normal	Normal
Normal	Normal	Normal	Normal
Normal	Normal	Normal	Normal
Normal	Normal	Normal	Normal
Normal	Normal	Normal	Normal
Normal	Normal	Normal	Normal
Normal	Normal	Sym	Normal
	Normal	Normal
	Normal	Normal
	Normal	Normal
	Normal
	Normal
