# Supplementary material for: Distinct functions of three Wnt proteins control mirror-symmetric organogenesis in the C. elegans gonad
Source: eLife. 2024 Nov 1;13:e103035. doi: 10.7554/eLife.103035 (PMC11620738; doi:10.7554/eLife.103035)
Supplement: Figure 4—source data 1. [file elife-103035-fig4-data1.xlsx]

## Sheet: Figure4A
Poparity of Z1p	DTC migration pattern
Revrse	Normal
Normal	Dpd
Revrse	Normal
Normal	Dpd
Revrse	Dpd
Revrse	Dpd
Normal	Dpd
Normal	Dpd
Revrse	Dpd
Normal	Normal

## Sheet: Figure4B
Poparity of Z1p	DTC migration pattern
Revrse	Dpd
Revrse	Dpd
Revrse	Dpd
Revrse	Normal
Revrse	Dpd
Revrse	Dpd
Revrse	Dpd
Revrse	Normal
Revrse	Normal
Normal	Dpd
Revrse	Dpd

## Sheet: Figure4C
DTC migration pattern
Z1pZ1ap_ablation	Z1pZ1aa_ablation
One_arm	Normal
One_arm	Normal
One_arm	One_arm
One_arm	One_arm
One_arm	Normal
One_arm	Dpd
One_arm	One_arm
One_arm	One_arm
One_arm	Dpd
One_arm	One_arm
	Dpd
	One_arm
	One_arm
	One_arm
	One_arm
